# Supplementary material
Source: publisher figshare collection journal article supplement (https://wiley.figshare.com/ndownloader/files/5644668)
Supplement: Supplementary file 1 [file 5644668]

id	main_seed	name	distribution	transformation	distance	p	g	nsim	nperm.pam	nperm.d	seed	n_1	n_2	N	Delta	method	t1	t1.lb	t1.ub
1	50424	Ekofisk_C-D_ln.qp.bc0	log-normal	quarter-power	bray-curtis0	173	2	1000	999	999	584560317	10	6	16	0	PERMANOVA	0.055	0.0420592094872731	0.0714660249638561
2	50424	Ekofisk_C-D_ln.qp.bc0	log-normal	quarter-power	bray-curtis0	173	2	1000	999	999	749713580	10	6	16	0.1	PERMANOVA	0.067	0.0526570126559605	0.0847630772803126
3	50424	Ekofisk_C-D_ln.qp.bc0	log-normal	quarter-power	bray-curtis0	173	2	1000	999	999	554207398	10	6	16	0.2	PERMANOVA	0.136	0.115676673798054	0.159174503112388
4	50424	Ekofisk_C-D_ln.qp.bc0	log-normal	quarter-power	bray-curtis0	173	2	1000	999	999	731758620	10	6	16	0.3	PERMANOVA	0.262	0.235212535267358	0.290642337165742
5	50424	Ekofisk_C-D_ln.qp.bc0	log-normal	quarter-power	bray-curtis0	173	2	1000	999	999	590386241	10	6	16	0.4	PERMANOVA	0.5	0.469069600368104	0.530930399631896
6	50424	Ekofisk_C-D_ln.qp.bc0	log-normal	quarter-power	bray-curtis0	173	2	1000	999	999	231298576	10	6	16	0.5	PERMANOVA	0.737	0.708328334761799	0.763824626885103
7	50424	Ekofisk_C-D_ln.qp.bc0	log-normal	quarter-power	bray-curtis0	173	2	1000	999	999	225697184	10	6	16	0.6	PERMANOVA	0.934	0.916339213048984	0.948232064434695
8	50424	Ekofisk_C-D_ln.qp.bc0	log-normal	quarter-power	bray-curtis0	173	2	1000	999	999	121403896	10	6	16	0.7	PERMANOVA	0.995	0.987656674806932	0.998157777888535
9	50424	Ekofisk_C-D_ln.qp.bc0	log-normal	quarter-power	bray-curtis0	173	2	1000	999	999	256078439	10	6	16	0.8	PERMANOVA	1	0.995229270628373	1
10	50424	Ekofisk_C-D_ln.qp.bc0	log-normal	quarter-power	bray-curtis0	173	2	1000	999	999	115609478	10	6	16	0.9	PERMANOVA	1	0.995229270628373	1
11	50424	Ekofisk_C-D_ln.qp.bc0	log-normal	quarter-power	bray-curtis0	173	2	1000	999	999	550417839	10	6	16	1	PERMANOVA	1	0.995229270628373	1
1	50424	Ekofisk_C-D_ln.qp.bc0	log-normal	quarter-power	bray-curtis0	173	2	1000	999	999	584560317	10	6	16	0	ANOSIM	0.041	0.0299377286234018	0.0557164447841928
2	50424	Ekofisk_C-D_ln.qp.bc0	log-normal	quarter-power	bray-curtis0	173	2	1000	999	999	749713580	10	6	16	0.1	ANOSIM	0.097	0.0797129569358394	0.117455026928956
3	50424	Ekofisk_C-D_ln.qp.bc0	log-normal	quarter-power	bray-curtis0	173	2	1000	999	999	554207398	10	6	16	0.2	ANOSIM	0.171	0.148462689361709	0.196109087479278
4	50424	Ekofisk_C-D_ln.qp.bc0	log-normal	quarter-power	bray-curtis0	173	2	1000	999	999	731758620	10	6	16	0.3	ANOSIM	0.344	0.314716539901091	0.374497641478296
5	50424	Ekofisk_C-D_ln.qp.bc0	log-normal	quarter-power	bray-curtis0	173	2	1000	999	999	590386241	10	6	16	0.4	ANOSIM	0.54	0.508514742276408	0.571174171325479
6	50424	Ekofisk_C-D_ln.qp.bc0	log-normal	quarter-power	bray-curtis0	173	2	1000	999	999	231298576	10	6	16	0.5	ANOSIM	0.75	0.721723878775808	0.776327185945065
7	50424	Ekofisk_C-D_ln.qp.bc0	log-normal	quarter-power	bray-curtis0	173	2	1000	999	999	225697184	10	6	16	0.6	ANOSIM	0.921	0.902079227098109	0.936602905927352
8	50424	Ekofisk_C-D_ln.qp.bc0	log-normal	quarter-power	bray-curtis0	173	2	1000	999	999	121403896	10	6	16	0.7	ANOSIM	0.977	0.965129797858395	0.985027064666523
9	50424	Ekofisk_C-D_ln.qp.bc0	log-normal	quarter-power	bray-curtis0	173	2	1000	999	999	256078439	10	6	16	0.8	ANOSIM	0.998	0.991967485347614	0.999653506836727
10	50424	Ekofisk_C-D_ln.qp.bc0	log-normal	quarter-power	bray-curtis0	173	2	1000	999	999	115609478	10	6	16	0.9	ANOSIM	0.999	0.993531214953175	0.999947797644557
11	50424	Ekofisk_C-D_ln.qp.bc0	log-normal	quarter-power	bray-curtis0	173	2	1000	999	999	550417839	10	6	16	1	ANOSIM	1	0.995229270628373	1
1	50424	Ekofisk_C-D_ln.qp.bc0	log-normal	quarter-power	bray-curtis0	173	2	1000	999	999	584560317	10	6	16	0	Mantel	0.044	0.0325082134598808	0.0591175271808763
2	50424	Ekofisk_C-D_ln.qp.bc0	log-normal	quarter-power	bray-curtis0	173	2	1000	999	999	749713580	10	6	16	0.1	Mantel	0.097	0.0797129569358394	0.117455026928956
3	50424	Ekofisk_C-D_ln.qp.bc0	log-normal	quarter-power	bray-curtis0	173	2	1000	999	999	554207398	10	6	16	0.2	Mantel	0.184	0.160735732793997	0.209732970295685
4	50424	Ekofisk_C-D_ln.qp.bc0	log-normal	quarter-power	bray-curtis0	173	2	1000	999	999	731758620	10	6	16	0.3	Mantel	0.368	0.338178146963434	0.398848982025915
5	50424	Ekofisk_C-D_ln.qp.bc0	log-normal	quarter-power	bray-curtis0	173	2	1000	999	999	590386241	10	6	16	0.4	Mantel	0.564	0.532576091086308	0.594926130773037
6	50424	Ekofisk_C-D_ln.qp.bc0	log-normal	quarter-power	bray-curtis0	173	2	1000	999	999	231298576	10	6	16	0.5	Mantel	0.778	0.750686705887018	0.803144429614024
7	50424	Ekofisk_C-D_ln.qp.bc0	log-normal	quarter-power	bray-curtis0	173	2	1000	999	999	225697184	10	6	16	0.6	Mantel	0.938	0.920758374719203	0.951778158644379
8	50424	Ekofisk_C-D_ln.qp.bc0	log-normal	quarter-power	bray-curtis0	173	2	1000	999	999	121403896	10	6	16	0.7	Mantel	0.982	0.971120411603605	0.988972577080867
9	50424	Ekofisk_C-D_ln.qp.bc0	log-normal	quarter-power	bray-curtis0	173	2	1000	999	999	256078439	10	6	16	0.8	Mantel	1	0.995229270628373	1
10	50424	Ekofisk_C-D_ln.qp.bc0	log-normal	quarter-power	bray-curtis0	173	2	1000	999	999	115609478	10	6	16	0.9	Mantel	1	0.995229270628373	1
11	50424	Ekofisk_C-D_ln.qp.bc0	log-normal	quarter-power	bray-curtis0	173	2	1000	999	999	550417839	10	6	16	1	Mantel	1	0.995229270628373	1
1	50424	Ekofisk_C-D_ln.qp.bc0	log-normal	quarter-power	bray-curtis0	173	2	1000	999	999	584560317	10	6	16	0	PERMDISP.c	0.075	0.059803293995141	0.0935483943328867
2	50424	Ekofisk_C-D_ln.qp.bc0	log-normal	quarter-power	bray-curtis0	173	2	1000	999	999	749713580	10	6	16	0.1	PERMDISP.c	0.071	0.0562229167769598	0.0891628343258508
3	50424	Ekofisk_C-D_ln.qp.bc0	log-normal	quarter-power	bray-curtis0	173	2	1000	999	999	554207398	10	6	16	0.2	PERMDISP.c	0.077	0.0615985764874003	0.0957361729081764
4	50424	Ekofisk_C-D_ln.qp.bc0	log-normal	quarter-power	bray-curtis0	173	2	1000	999	999	731758620	10	6	16	0.3	PERMDISP.c	0.107	0.0888639055886118	0.128222033183601
5	50424	Ekofisk_C-D_ln.qp.bc0	log-normal	quarter-power	bray-curtis0	173	2	1000	999	999	590386241	10	6	16	0.4	PERMDISP.c	0.115	0.0962224852905494	0.136798281352336
6	50424	Ekofisk_C-D_ln.qp.bc0	log-normal	quarter-power	bray-curtis0	173	2	1000	999	999	231298576	10	6	16	0.5	PERMDISP.c	0.141	0.120334805055891	0.164476246663355
7	50424	Ekofisk_C-D_ln.qp.bc0	log-normal	quarter-power	bray-curtis0	173	2	1000	999	999	225697184	10	6	16	0.6	PERMDISP.c	0.172	0.149405092845731	0.197158744081252
8	50424	Ekofisk_C-D_ln.qp.bc0	log-normal	quarter-power	bray-curtis0	173	2	1000	999	999	121403896	10	6	16	0.7	PERMDISP.c	0.196	0.172104518720409	0.222269289581889
9	50424	Ekofisk_C-D_ln.qp.bc0	log-normal	quarter-power	bray-curtis0	173	2	1000	999	999	256078439	10	6	16	0.8	PERMDISP.c	0.224	0.198765756875944	0.251387374467445
10	50424	Ekofisk_C-D_ln.qp.bc0	log-normal	quarter-power	bray-curtis0	173	2	1000	999	999	115609478	10	6	16	0.9	PERMDISP.c	0.225	0.199721169458096	0.252424096820162
11	50424	Ekofisk_C-D_ln.qp.bc0	log-normal	quarter-power	bray-curtis0	173	2	1000	999	999	550417839	10	6	16	1	PERMDISP.c	0.243	0.216953850388287	0.271050004179915
1	50424	Ekofisk_C-D_ln.qp.bc0	log-normal	quarter-power	bray-curtis0	173	2	1000	999	999	584560317	10	6	16	0	PERMDISP.p	0.059	0.0455736422141862	0.0759161314104837
2	50424	Ekofisk_C-D_ln.qp.bc0	log-normal	quarter-power	bray-curtis0	173	2	1000	999	999	749713580	10	6	16	0.1	PERMDISP.p	0.046	0.0342307954228019	0.0613762719172118
3	50424	Ekofisk_C-D_ln.qp.bc0	log-normal	quarter-power	bray-curtis0	173	2	1000	999	999	554207398	10	6	16	0.2	PERMDISP.p	0.057	0.0438139736608572	0.0736934714970359
4	50424	Ekofisk_C-D_ln.qp.bc0	log-normal	quarter-power	bray-curtis0	173	2	1000	999	999	731758620	10	6	16	0.3	PERMDISP.p	0.067	0.0526570126559605	0.0847630772803126
5	50424	Ekofisk_C-D_ln.qp.bc0	log-normal	quarter-power	bray-curtis0	173	2	1000	999	999	590386241	10	6	16	0.4	PERMDISP.p	0.085	0.0688109777412627	0.10445654810791
6	50424	Ekofisk_C-D_ln.qp.bc0	log-normal	quarter-power	bray-curtis0	173	2	1000	999	999	231298576	10	6	16	0.5	PERMDISP.p	0.097	0.0797129569358394	0.117455026928956
7	50424	Ekofisk_C-D_ln.qp.bc0	log-normal	quarter-power	bray-curtis0	173	2	1000	999	999	225697184	10	6	16	0.6	PERMDISP.p	0.13	0.110099559433578	0.15279988414417
8	50424	Ekofisk_C-D_ln.qp.bc0	log-normal	quarter-power	bray-curtis0	173	2	1000	999	999	121403896	10	6	16	0.7	PERMDISP.p	0.153	0.131550817868497	0.177164248128812
9	50424	Ekofisk_C-D_ln.qp.bc0	log-normal	quarter-power	bray-curtis0	173	2	1000	999	999	256078439	10	6	16	0.8	PERMDISP.p	0.177	0.154121367462213	0.202402798723916
10	50424	Ekofisk_C-D_ln.qp.bc0	log-normal	quarter-power	bray-curtis0	173	2	1000	999	999	115609478	10	6	16	0.9	PERMDISP.p	0.183	0.159790015910188	0.208686605327359
11	50424	Ekofisk_C-D_ln.qp.bc0	log-normal	quarter-power	bray-curtis0	173	2	1000	999	999	550417839	10	6	16	1	PERMDISP.p	0.2	0.175902118039162	0.226440105499554
